# Supplementary material for: Ultra pH-sensitive polymeric nanovesicles co-deliver doxorubicin and navitoclax for synergetic therapy of endometrial carcinoma
Source: Royal Society of Chemistry journal article supplement (doi:10.1039/d0bm00112k), 2020-01-01
Supplement: d0bm00112k1.pdf [file d0bm00112k1.pdf]

## Supporting Information

### Ultra pH-sensitive polymeric nanovesicles co-deliver doxorubicin and navitoclax for synergetic therapy of endometrial carcinoma

Jie Ding<sup>†,1</sup>, Xu Zhang<sup>†,1</sup>, Chuangqi Chen<sup>2</sup>, Yuqiang Huang<sup>2</sup>, Xingsu Yu<sup>\*,2</sup>, and

Xiaomao Li<sup>\*,1</sup>

<sup>1</sup>Department of Gynecology and Obstetrics, The Third Affiliated Hospital of Sun Yat-sen University, Guangzhou 510630, China

<sup>2</sup>Reproductive Center, Guangdong Women's Health Care Center, Guangzhou 511400, China

<sup>†</sup>These authors contributed equally.

\*Correspondence should be addressed to:

Xiaomao Li

E-mail: [lixmao@mail.sysu.edu.cn](mailto:lixmao@mail.sysu.edu.cn)

Xingsu Yu

E-mail: [yxs1212@126.com](mailto:yxs1212@126.com)

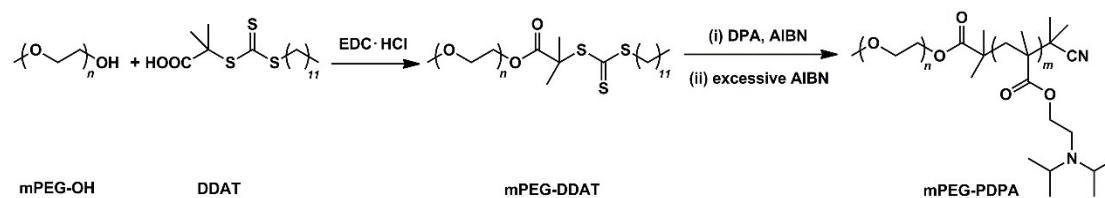

**Figure S1.** Synthetic route of mPEG-PDPA.

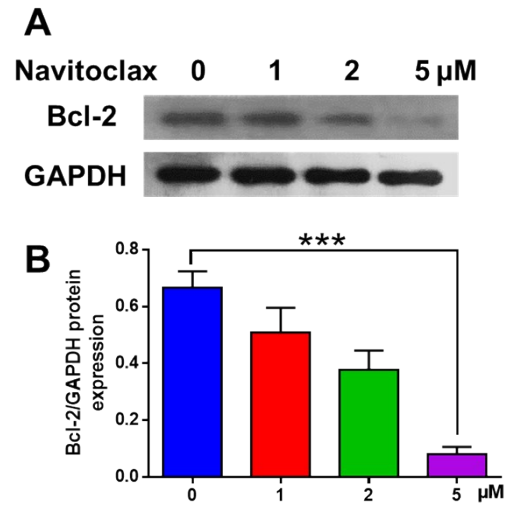

**Figure S2.** (A) Protein expression of Bcl-2 in Ishikawa cells incubated with NP@Nav at different concentrations, as determined by western blot assay. (B) Relative protein levels quantified from the Western blot assay (mean  $\pm$  SD, n=3). \*\*\* $p$ <0.001.
